# Supplementary material for: WITHDRAWN: Brain Tumor detection and Classification Using Deep Learning
Source: Research Square preprint supplement (doi:10.21203/rs.3.rs-6383701/v1), 2025-07-02
Supplement: Supplementary file 1 [file 57d0c5d1b6de717240e3a889.docx]

Supplementary File

# Brain Tumor Detection and Classification Using Deep Learning

## 1. Dataset Details

The dataset used for this research is the publicly available Figshare brain tumor dataset. It consists of T1-weighted contrast-enhanced MRI images categorized into three classes: glioma, meningioma, and pituitary tumors. The dataset contains 3,064 images.

## 2. Preprocessing and Augmentation

Images were resized to 224x224 before feeding into CNNs. Augmentation techniques included rotation, flipping, noise injection, and intensity scaling to improve generalization and address class imbalance.

## 3. Model Architectures and Modifications

The following pre-trained CNNs were used and modified:
- GoogleNet: last 3 layers replaced with fully connected layer, softmax, and output classifier.
- AlexNet: final layers adjusted for 3-class output.
- SqueezeNet: replaced final convolutional and classification layers.
- ShuffleNet: applied pointwise group convolutions and channel shuffle.
- NASNet-Mobile: replaced last 3 layers for brain tumor classification.

## 4. Ensemble Voting Mechanism

A majority voting ensemble was formed using GoogleNet, SqueezeNet, and ShuffleNet, resulting in improved accuracy (98.6%) and precision (96.2%) over individual models.

## 5. Visualization via Grad-CAM

Grad-CAM visualizations were employed to ensure tumor regions were correctly identified. These heatmaps matched radiologist annotations with 95% accuracy and reduced false positives by 15%.

## 6. Experimental Setup

Training was conducted using five-fold cross-validation. Hyperparameters: learning rate = 0.01, dropout = 0.5, batch size = 32.

## 7. Performance Metrics

Evaluation used accuracy, precision, recall, F1-score, and AUC. Best ensemble model achieved 98.6% accuracy and F1-score of 0.93.

## 8. Tools and Libraries Used

- Python 3.x
- TensorFlow/Keras
- OpenCV
- Scikit-learn
- Grad-CAM package
